# Supplementary material
Source: PubMed Central journal article supplement (PMC4482134)
Supplement: NIHMS595511-supplement-Supp_Material.pdf [file NIHMS595511-supplement-Supp_Material.pdf]

## Supporting Documents:

### Supplemental Figure Legends.

**Supplemental Figure 1. RB deletion modulates proliferation in the liver. (A)** Percent BrdU incorporation in livers corresponding to individual genotypes, as indicated by PCR for presence of *RB exon 19*. **(B)** Protein lysates from multiple livers of each treatment, immunoblotted for indicated proteins.

**Supplemental Figure 2. Additional enriched molecular networks associated with the liver-specific RB-loss gene signature. (A)** Molecular networks of upregulated genes most significantly affected by loss of RB as indicated by IPA. Indicated functional associations included “DNA Replication, Recombination, and Repair, Cell Cycle, Cellular Assembly and Organization” (Left) and “Cell Cycle, Cellular Assembly and Organization, Cellular Function and Maintenance” (Right). **(B)** Molecular networks of downregulated genes most significantly affected by loss of RB as indicated by IPA. Indicated functional associations included “Cellular Development, Hematological System Development and Function, Hematopoiesis” (Left) and “Hematological System Development and Function, Tissue Morphology, Cell-To-Cell Signaling and Interaction” (Right).

**Supplemental Figure 3. RB loss results in differential expression of both NF- $\kappa$ B and IFN target genes. (A)** Graphical representation of differentially expressed NF $\kappa$ B transcriptional targets in RB-flox mice infected with Ad-Cre as compared to Ad-LacZ. The list of NF $\kappa$ B targets was compiled from DAVID. **(B)** Graphical representation of type 1 and type 2 IFN mediated genes with altered expression in RB-flox mice infected with Ad-Cre as compared to Ad-LacZ as determined by query of the INTERFEROME database.

Supplemental Figure 1.

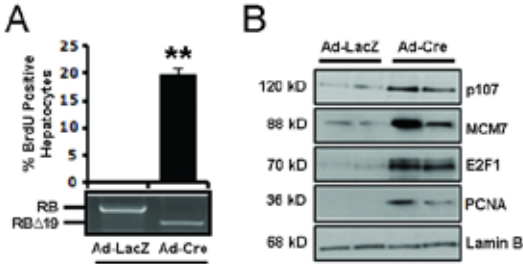

Supplemental Figure 2.

A

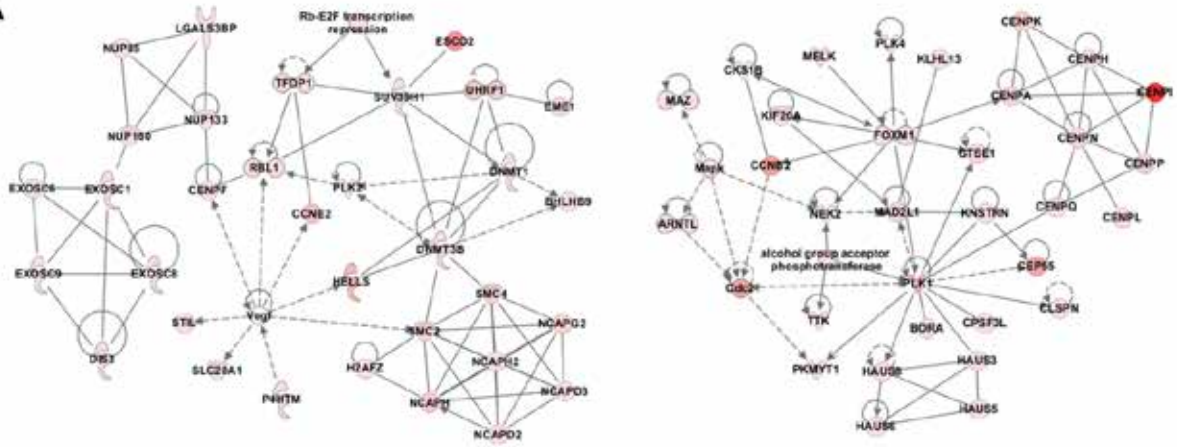

B

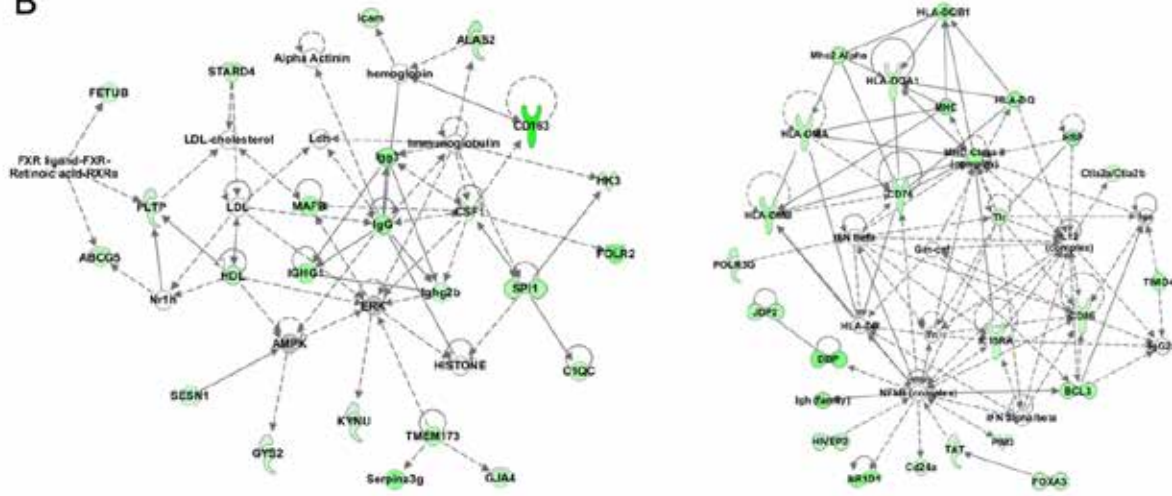

Supplemental Figure 3.

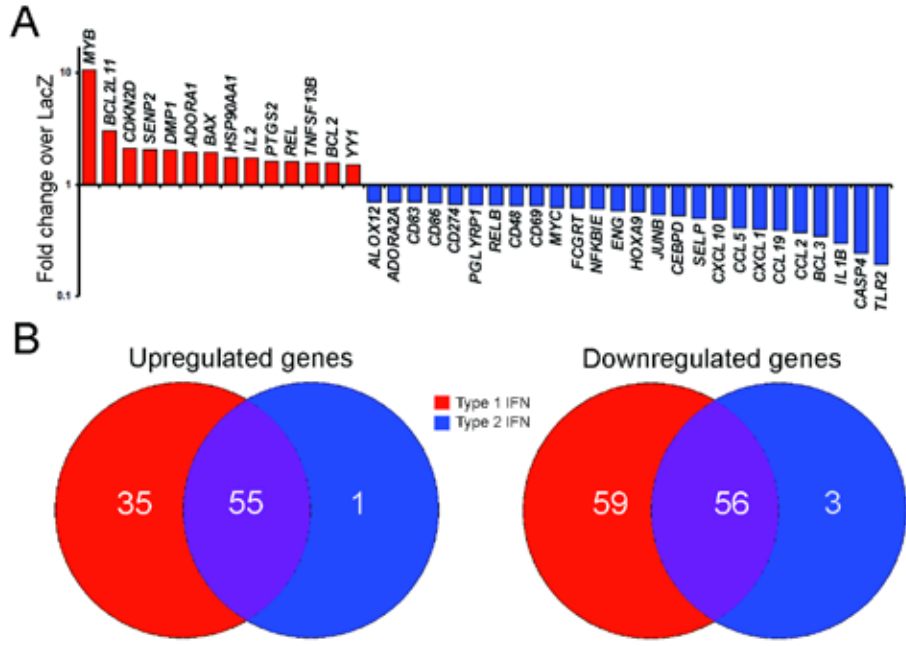

Supplemental Table 1. The liver-specific RB-loss gene signature.

| Increased Expression<br>RB-flox +Ad-Cre | Decreased Expression<br>RB-flox +Ad-Cre |
|-----------------------------------------|-----------------------------------------|
| MTHFD2                                  | SLC25A34                                |
| CDC20                                   | TRAPPC9                                 |
| NUSAP1                                  | COL27A1                                 |
| KIF22                                   | NGEF                                    |
| PBK                                     | MAN1C1                                  |
| SGOL1                                   | MUSTN1                                  |
| ALDH1L2                                 | B3GNT9                                  |
| ANKLE1                                  | IER2                                    |
| CCNE1                                   | MYO1D                                   |
| FTSJ3                                   | CLCN2                                   |
| BIRC5                                   | SLC25A33                                |
| CCNB1                                   | DOCK9                                   |
| PRC1                                    | DNAJC12                                 |
| CKAP2                                   | SCRN2                                   |
| NCAPD2                                  | S100A4                                  |
| CDCA8                                   | HS3ST3A1                                |
| CCNA2                                   | SLC38A1                                 |
| FAM81A                                  | TGFB11                                  |
| TPX2                                    | EBI3                                    |
| GPX7                                    | SORBS3                                  |
| INCENP                                  | DENND1C                                 |
| DUT                                     | CORO2B                                  |
| LMNB1                                   | ERRF1                                   |
| PTTG1                                   | GBA2                                    |
| FANCB                                   | FICD                                    |
| CDKN1A                                  | DEDD2                                   |
| PSRC1                                   | ZYX                                     |
| DDIT4L                                  | TMED8                                   |
| DNMT1                                   | RFTN1                                   |
| HAPLN1                                  | MPP4                                    |
| SHCBP1                                  | FES                                     |
| PLK1                                    | CHST2                                   |
| DEFB1                                   | PF4                                     |
| PTGR1                                   | CD300LG                                 |
| SYCE2                                   | SOX6                                    |
| RRM1                                    | SLC12A9                                 |
| NIPA1                                   | FAM46C                                  |
| BUB1                                    | ARL4C                                   |
| RDBP                                    | RASSF6                                  |
| ESPL1                                   | SELPLG                                  |
| CENPI                                   | TENC1                                   |
| CENPN                                   | TNFRSF21                                |
| TRIM59                                  | GBP2                                    |
| CCNF                                    | SERPINE2                                |

|         |          |
|---------|----------|
| COBL    | TPPP     |
| LIG1    | UPK3B    |
| EZH2    | MVP      |
| CHAF1B  | PTPLAD2  |
| TMEM9   | EVI2A    |
| KNTC1   | CYTIP    |
| TTC39A  | EPS15L1  |
| CCDC120 | RHBDL1   |
| RAD51C  | ANGEL1   |
| USP43   | LRRC8C   |
| HSD3B1  | COL6A1   |
| LSM2    | ADCY4    |
| IQGAP3  | ELMO3    |
| PPL     | ABCA7    |
| MXD3    | ACVRL1   |
| COX6B2  | CYP26A1  |
| CTPS    | ABLIM3   |
| PDXP    | WVOX     |
| HN1     | HMHA1    |
| CCNB2   | IL18BP   |
| CDCA3   | MRPL38   |
| GINS2   | TMCO4    |
| SLBP    | FOXC2    |
| CEP55   | NFKBIA   |
| PLEK2   | METTL8   |
| NENF    | SOX7     |
| TACC3   | GBP1     |
| MCM7    | VAT1     |
| DLGAP5  | LHCGR    |
| PPM1M   | DCUN1D4  |
| LRFN3   | FRMD6    |
| SMC2    | SLC22A3  |
| HAT1    | PRELP    |
| NUP133  | LY9      |
| CHCHD6  | FOS      |
| SPC25   | NOTUM    |
| CENPL   | SLC1A2   |
| MAST2   | ARAP1    |
| CENPK   | ACSS2    |
| NFKBIL2 | DLGAP4   |
| CPSF3L  | TRPM2    |
| NQO1    | ADAMTS10 |
| CENPM   | PCSK4    |
| TOP2A   | PDE1B    |
| RNF144A | CCT6B    |
| UBE2T   | PTGS1    |
| RFC1    | SHB      |
| GDF15   | IRX3     |

|         |           |
|---------|-----------|
| ASF1B   | RUFY2     |
| MLKL    | FAM102A   |
| REEP5   | AVIL      |
| SGOL2   | AP4S1     |
| CCHCR1  | CALCOCO1  |
| HAUS8   | PKNOX2    |
| MAD2L2  | ARHGEF10L |
| SF3A3   | HCN3      |
| TTK     | TMEM119   |
| PMCH    | CD300A    |
| CDCA2   | MFSD2     |
| DNA2    | CD7       |
| RPA2    | HSD3B2    |
| ECT2    | KRT10     |
| CKAP2L  | ID1       |
| TCF19   | TAL1      |
| RACGAP1 | SH3YL1    |
| MLF1IP  | CDC42EP2  |
| NUF2    | ZKSCAN5   |
| MESP2   | AKAP8L    |
| OIP5    | SLC24A6   |
| ANLN    | SLC35D3   |
| MYB     | RNF34     |
| RRM2    | CD38      |
| MYH7B   | SETD4     |
| VNN1    | ATRNL1    |
| S100G   | LCP2      |
| EME1    | KLF9      |
| MELK    | STX6      |
| DEPDC1B | ASNS      |
| CDCA5   | GPR18     |
| KIF20A  | SLC25A29  |
| DBF4    | RCL1      |
| SIVA1   | AKT2      |
| ESCO2   | POLG2     |
| NUP85   | TIPARP    |
| PRIM1   | SELM      |
| NUP93   | ZPBP2     |
| CENPE   | PREX1     |
| CCDC34  | PTPRC     |
| GTSE1   | PLBD2     |
| MORC4   | SCARA3    |
| UHMK1   | EFCAB4A   |
| CHTF18  | TNKS1BP1  |
| MGST2   | NFKBIE    |
| TUBB6   | CCPG1     |
| AURKA   | F13A1     |
| ALS2CR4 | ELK3      |

|           |           |
|-----------|-----------|
| COL12A1   | PEX12     |
| NSMCE1    | CD69      |
| FEN1      | CALML4    |
| PDK3      | CHD6      |
| WDHD1     | SPRY4     |
| HEY2      | HOXA9     |
| NANS      | ENG       |
| CCNE2     | OSGIN1    |
| ZCCHC3    | TNFAIP8L2 |
| G2E3      | SLC2A8    |
| TUBGCP2   | SLC41A1   |
| AQP8      | FBXO36    |
| ORC6L     | CD37      |
| BRCA2     | TNFRSF1B  |
| ATPIF1    | NEB       |
| CDKN2C    | PIM2      |
| APITD1    | JUNB      |
| CRIP2     | TMC4      |
| POLA1     | CEBPD     |
| TAF1D     | SLC25A35  |
| IPO9      | MCOLN1    |
| CDA       | ANK3      |
| REM2      | CLDN14    |
| IFI44     | TSPYL5    |
| GPC1      | VAMP4     |
| ADAT2     | POLI      |
| WDR77     | ANGPTL6   |
| FBXO5     | C1QA      |
| PKMYT1    | BCL2L15   |
| DHRS13    | AGPAT4    |
| ARSG      | ZDHHC14   |
| NCAPH     | CXCL1     |
| WFDC12    | GABRR2    |
| RAD51L1   | NPFF      |
| WBP5      | GRIK5     |
| ATAD2     | F3        |
| DSN1      | AMOTL2    |
| LGALS1    | CLEC1B    |
| TRAIP     | CLN3      |
| ARHGAP11A | EGR1      |
| UMPS      | NTRK2     |
| NUP210    | RAPGEF3   |
| EXOSC8    | NKG7      |
| NDC80     | SLC11A1   |
| RUNDC3B   | S100A8    |
| PBX3      | ADM       |
| RFC5      | TIE1      |
| CDCA7L    | MVD       |



|         |         |
|---------|---------|
| ACPL2   | GPR110  |
| AURKB   | TLR7    |
| TMPO    | PRKCB   |
| PRELID2 | MEGF8   |
| CYP17A1 | CD44    |
| OTUD1   | ID3     |
| FANCD2  | CASP1   |
| TRIP13  | ELAC1   |
| RANBP1  | MARCO   |
| TFDP1   | DHRS1   |
| ZDHHC18 | DHX8    |
| AS3MT   | BANK1   |
| MFGE8   | LAMA2   |
| ZWILCH  | GNE     |
| CAMK2N2 | THBD    |
| WDR76   | AGXT2L1 |
| NCAPG2  | ZMYM5   |
| POLE2   | PFDN2   |
| PKHD1   | OSMR    |
| MRE11A  | KLHL35  |
| KIF20B  | HCK     |
| PCGF2   | ARRDC4  |
| TFAM    | KIF21B  |
| HSPA14  | HLCS    |
| RBBP8   | TSHZ3   |
| VPS36   | TSPAN13 |
| MTMR11  | MBLAC2  |
| CSTF2   | SPATA2L |
| PMF1    | TMEM140 |
| DCK     | PYROXD2 |
| LBR     | DACH2   |
| TMEM48  | LILRB3  |
| MCM3    | CCL24   |
| PARP2   | TSHZ2   |
| FLRT1   | OAF     |
| BIK     | CD53    |
| PPM1G   | RCSD1   |
| SMC4    | HSPA2   |
| MSH6    | LDB2    |
| CDT1    | DNAJB14 |
| PSIP1   | TPD52L1 |
| NAP1L1  | CNN2    |
| MTNR1A  | NAT1    |
| CDKN1C  | CPNE8   |
| UBE2CBP | SIK1    |
| RFC4    | RAMP2   |
| DONSON  | TNRC6B  |
| CDC45L  | ENPP1   |

|          |          |
|----------|----------|
| CBX6     | PAMR1    |
| LYAR     | LSS      |
| COL1A1   | ANTXR1   |
| DDX39    | TMEM106A |
| RAD54L   | AKAP12   |
| POLD1    | SGCD     |
| CENPH    | CD3E     |
| RGS12    | TBX2     |
| NEK2     | EMR1     |
| PQLC3    | TRPC4AP  |
| BAX      | TPO      |
| FXN      | ARAP3    |
| HMMR     | HABP4    |
| POLD3    | TPM2     |
| MAGOHB   | CYP4B1   |
| TMEM139  | BCCIP    |
| AGA      | DOCK6    |
| LYSMD2   | BIRC3    |
| MCM2     | PDE7B    |
| PPP4R1   | PMAIP1   |
| CARHSP1  | SYDE1    |
| GYPC     | NTN1     |
| CCDC11   | NLRP3    |
| PFDN4    | TNIP1    |
| LARP7    | ENTPD2   |
| PCK2     | LECT2    |
| MYEF2    | MORN1    |
| NOTCH1   | SLC6A16  |
| UNC119   | TEF      |
| CENPA    | MAFF     |
| CDC42BPA | PPP1R9A  |
| RCN2     | DNAJB2   |
| BUB1B    | TGFB1    |
| PLK4     | MEIG1    |
| SLC25A31 | SOAT1    |
| BBS12    | RAB20    |
| SAMD10   | RGL1     |
| TCIRG1   | TCP11L2  |
| NUP205   | ANKRD12  |
| SERPINB8 | ABI3     |
| TOMM22   | CYP2S1   |
| FAM83D   | ID2      |
| CDCA7    | CCL5     |
| BCL7C    | VEGFA    |
| MCM4     | FADS2    |
| TSGA14   | TAF9B    |
| PALB2    | FAM26F   |
| MAD2L1   | ABCC1    |

|          |         |
|----------|---------|
| FAM89A   | LRRC16A |
| PDE7A    | NCALD   |
| ARNTL    | GIMAP6  |
| SASS6    | AFAP1L1 |
| P4HTM    | NFKB2   |
| NUDT5    | FERMT3  |
| CLOCK    | SMAD7   |
| ACTL6A   | LPIN2   |
| GPR172B  | TCHH    |
| SNRPD3   | ERI3    |
| GSG2     | ALAS1   |
| CYTSB    | RGS10   |
| FAM101B  | SBSN    |
| SKP2     | IL10RA  |
| PPIL1    | CDKN2B  |
| CYP39A1  | DSE     |
| CAND2    | LRRC33  |
| TSSC4    | COL5A1  |
| SAE1     | OSGEP   |
| IDH2     | DPYS    |
| PARP1    | PDILT   |
| DDIT4    | MYO7A   |
| RHBDF1   | TIFA    |
| HELLS    | KCNH8   |
| TRIM68   | SUSD4   |
| YPEL1    | ZFP36   |
| CCDC99   | GRASP   |
| E2F2     | CRIP1   |
| ERMP1    | CSF1R   |
| PAFAH1B3 | THYN1   |
| TMEM43   | ROPN1L  |
| CCDC67   | GRAP    |
| E2F8     | SRD5A1  |
| RFC2     | PIK3R6  |
| IFT80    | POR     |
| MAEL     | TNFAIP8 |
| WDR67    | IFITM1  |
| BRIP1    | ABCC9   |
| PRUNE    | SPRN    |
| SNRPD1   | SDS     |
| CENPJ    | KCTD11  |
| CENPF    | LAPTM5  |
| MCM5     | PFKFB3  |
| TFRC     | AXL     |
| CDC25A   | GNAT1   |
| TMPRSS4  | GALNT14 |
| APRT     | CADM4   |
| ADCY6    | ABCG8   |

|           |          |
|-----------|----------|
| MDC1      | NFKBID   |
| NUP155    | DNAJB5   |
| CAV2      | TGFB3    |
| ARC       | FHL2     |
| HIST2H2BE | GEM      |
| STEAP2    | TINAGL1  |
| NAP1L3    | BMX      |
| RPS6KA1   | PPAPDC3  |
| FAM118B   | RABIF    |
| PTPN21    | SOD3     |
| FRY       | FYN      |
| CAPRIN1   | CYP1A2   |
| CAPRIN2   | CCL2     |
| CD276     | PCDHB17  |
| RBBP7     | GNA14    |
| SSRP1     | NOX4     |
| ZFP41     | DNAJA4   |
| HAUS5     | LYL1     |
| LIMD2     | CBS      |
| TIMM50    | TLR2     |
| DDX11     | TDRKH    |
| PPWD1     | IRF5     |
| GRIA3     | KCNK6    |
| EXOSC9    | RASGEF1B |
| RSPH9     | TROVE2   |
| ITGB1BP1  | PLCG2    |
| MYO5C     | FXD7     |
| RAD51AP1  | PDK2     |
| ITGAE     | ATP5S    |
| AK1       | HOXB5    |
| FANCF     | IGJ      |
| H2AFX     | CD14     |
| NRM       | UPP1     |
| NMB       | GIMAP4   |
| HAUS6     | PIGP     |
| KPNA3     | CEACAM1  |
| CENPQ     | IDO2     |
| MCM6      | RND1     |
| HEY1      | LACTB    |
| SETD8     | LIFR     |
| PANX1     | GFOD2    |
| FBXO43    | SDR42E1  |
| ATP2B2    | OAT      |
| PRCP      | IGSF6    |
| MAZ       | LSP1     |
| RAD51     | NECAB2   |
| HOMER3    | KLF2     |
| PLK2      | CYB5D2   |

|         |          |
|---------|----------|
| GMNN    | KLHL6    |
| MAP4K4  | PIGR     |
| ANAPC5  | PTGER2   |
| PNKD    | CXCL10   |
| CD36    | TGFBR3   |
| MCM8    | TPRKB    |
| SNN     | ARHGAP6  |
| FIGNL1  | IKBKE    |
| NT5DC2  | HOOK2    |
| PTRH1   | PODXL    |
| TYW3    | DAB2     |
| GOLM1   | TM7SF2   |
| TINF2   | GIMAP7   |
| MYH10   | TCF21    |
| RAB15   | SUCNR1   |
| SNX7    | ELL      |
| KLHL13  | AMOTL1   |
| TIPIN   | CXCL13   |
| KCTD3   | GLIPR1   |
| ZMYND19 | ARG2     |
| TUG1    | SLC25A25 |
| NCAPD3  | SC4MOL   |
| CRYM    | EVI2B    |
| CRAT    | TACC2    |
| EXOSC6  | FCGRT    |
| E2F1    | LST1     |
| UBA2    | HAPLN4   |
| ENDOD1  | EFEMP1   |
| CCNG1   | FPR2     |
| LONRF3  | TM4SF1   |
| SLC20A1 | C1QB     |
| CLDN1   | GAMT     |
| PRR5    | CSRNP1   |
| KIF18A  | FDX1     |
| EEP1    | WDR86    |
| TTLL4   | SOX15    |
| IPO5    | GCH1     |
| REEP4   | FCER1G   |
| GADD45B | FAM134B  |
| STIL    | HMOX1    |
| ODF2L   | CCDC114  |
| TRAF4   | IL15RA   |
| SMARCC1 | RBM11    |
| HIRIP3  | FXYD2    |
| MTBP    | HTRA1    |
| SVIL    | ARHGAP30 |
| LMO4    | STXBP1   |
| RNF168  | SCN1B    |

|          |          |
|----------|----------|
| RBL1     | RGS1     |
| PLD6     | SGSM1    |
| PHLDB1   | ROBO1    |
| WFDC2    | RNF10    |
| NFATC2IP | SHPK     |
| NUCKS1   | CASP12   |
| HNMT     | TLR4     |
| MMP17    | USO1     |
| PFAS     | PPP1R3F  |
| NVL      | GMPPA    |
| CDC25C   | ENTPD4   |
| ITGA5    | S100A9   |
| LSM3     | DARC     |
| RTN4RL1  | PDGFRA   |
| FBXO45   | HIVEP2   |
| FKBP3    | PLXDC1   |
| SOX12    | ZAP70    |
| TXNDC16  | CSF1     |
| RHOQ     | LPCAT2   |
| DTL      | DGKA     |
| PAQR4    | MASP1    |
| PSAT1    | IRX1     |
| IFI27L1  | THRSP    |
| PHF13    | CFP      |
| DNMT3B   | HES6     |
| TJP2     | ENTPD1   |
| PDZRN3   | FMNL2    |
| BHLHB9   | HSPA1A   |
| ZBTB45   | ECM1     |
| FAM48A   | KLF13    |
| CHIC1    | FYB      |
| PGP      | ALOX5AP  |
| GUCY2C   | EIF2C3   |
| GBE1     | GPR146   |
| LRIG3    | MAFK     |
| DIO3OS   | ARHGAP26 |
| CTNNAL1  | ESRRG    |
| ZDHHC2   | CALHM2   |
| SNX24    | CDC37    |
| TOPBP1   | AGXT     |
| CLSPN    | CD97     |
| DPY30    | HCST     |
| SUSD3    | ZDHHC9   |
| POLE     | CYTL1    |
| GEMIN8   | LTBP4    |
| RG9MTD2  | RENBP    |
| CPSF6    | GYS2     |
| RAB23    | FETUB    |

|         |          |
|---------|----------|
| SCRIB   | PIM3     |
| TRIM24  | SERTAD1  |
| SPINK5  | ZSWIM6   |
| RRAS2   | HIST1H3A |
| PTRH2   | GAPDHS   |
| PHF10   | NCF4     |
| SUV39H1 | HABP2    |
| HFE2    | SLC46A1  |
| GLOD5   | VPREB3   |
| LRP2BP  | POLR3G   |
| EXO1    | ICAM2    |
| SMC6    | HSPA1L   |
| BLM     | PDE2A    |
| RFC3    | TYROBP   |
| GLDC    | CABYR    |
| PLCL2   | PCK1     |
| KIF11   | MPV17L   |
| EPHB4   | PPM1K    |
| RNPEP   | PCBD2    |
| NSL1    | PLEKHA2  |
| EFNA2   | EMILIN2  |
| ALG8    | APOB48R  |
| LSM8    | CEBPB    |
| CDK2    | ITGB2    |
| MLEC    | KCNJ8    |
| CEP76   | COL6A2   |
| ZIK1    | KLF15    |
| RECQL   | ONECUT2  |
| FANCM   | PLTP     |
| WDR8    | EXTL1    |
| CENPT   | SERINC2  |
| LMF2    | SLC4A3   |
| RASL11B | SELP     |
| CLN6    | HYI      |
| SMC3    | KYNU     |
| PRKAA1  | CTGF     |
| PAXIP1  | TMEM173  |
| TRIOBP  | DNASE1L3 |
| AP4M1   | RAC2     |
| CDKN3   | MARCKS   |
| NUP160  | LRMP     |
| DIS3    | UNC13B   |
| TYMS    | FABP7    |
| FKBP5   | AIF1     |
| CASP7   | SLC39A11 |
| LEFTY1  | BCL3     |
| MAPK7   | ALAS2    |
| HCFC2   | SLC6A12  |

|          |          |
|----------|----------|
| HAMP     | IGFBP2   |
| IL17RB   | C1QC     |
| DAPK2    | COQ10B   |
| RQCD1    | CTRL     |
| FAM54A   | MACROD1  |
| GPSM2    | GJA4     |
| TRMT12   | CATSPER2 |
| LRRC3    | SLC22A7  |
| CHEK1    | NPR2     |
| ANAPC4   | FOXA3    |
| HUNK     | CD86     |
| H1FX     | SEMA3C   |
| RANBP3   | P2RY6    |
| ETAA1    | PLEKHB1  |
| PDGFC    | ABCG5    |
| NME4     | TIMD4    |
| PTPRU    | CD5L     |
| TEAD2    | P2RY13   |
| AAAS     | TMCC2    |
| SENP1    | CD74     |
| NUP43    | NPL2     |
| PLEKHG5  | GPX3     |
| RNASEH2B | HK3      |
| DCTPP1   | FPR1     |
| SMYD4    | TAT      |
| AIM1     | GDPD3    |
| ATP10D   | ACAD10   |
| SUV39H2  | C5AR1    |
| SULF2    | SLC38A3  |
| RAB34    | IL1B     |
| NFE2L2   | CYBA     |
| NUP107   | DBP      |
| RIC8B    | IMPDH1   |
| BRCA1    | MOXD1    |
| NUP62    | PDLIM4   |
| PMS1     | CD207    |
| CNTLN    | TRHDE    |
| CNTROB   | SLC15A3  |
| TLR1     | JDP2     |
| LANCL2   | COLEC10  |
| NOP58    | CASP4    |
| WHSC1    | CD3D     |
| ARPP19   | CD163    |
| SSNA1    | CCL8     |
| CC2D2A   | FOLR2    |
| ZNHIT3   | CLEC4F   |
| TUBB2A   | MAFB     |
| PIN1     | CRIP3    |



|         |
|---------|
| WDR89   |
| MESDC1  |
| PTPLB   |
| WDR90   |
| ENOPH1  |
| VPS37D  |
| E2F7    |
| RXRG    |
| DOCK7   |
| SLC16A7 |
| CGN     |
| GAR1    |
| SPAG5   |
| CCR1    |
| NKAP    |
| MTHFD1L |
| CTDSPL  |
| TUSC1   |
| ATAD5   |
| HAUS1   |
| ALS2CL  |
| TAF6    |
| HAUS4   |
| ZBTB25  |
| TWSG1   |
| MBNL3   |
| WDSUB1  |
| RFWD3   |
| KLF11   |
| BCL2L11 |
| ELOVL7  |
| SSTR2   |
| GINS3   |
| CKAP5   |
| CDC6    |
| TRMT2A  |
| ELMO2   |
| PARD6G  |
| DFNA5   |
| PTBP2   |
| MED9    |
| SIPA1L2 |
| MEX3B   |
| MDM2    |
| MED27   |
| SMTN    |
| CYB5R1  |
| GAS1    |

|          |
|----------|
| RCC2     |
| EED      |
| CCDC52   |
| TMEM184C |
| ITGA10   |
| MBD1     |
| TIMM22   |
| POLA2    |
| PHLDA3   |
| ATP10A   |
| IL33     |
| OMD      |
| IGSF1    |
| NEO1     |
| OXCT1    |
| MRAS     |
| SSX2IP   |
| CKLF     |
| RAD21    |
| MUM1     |
| IFT74    |
| DSCC1    |
| TMEM107  |
| LAG3     |
| RFK      |
| MAP4K2   |
| EVC      |
| NUPL1    |
| PLCH1    |
| S1PR2    |
| MSL3     |
| ARL6IP6  |
| MET      |
| ACTR6    |
| ZMYND8   |
| SNX26    |
| SNX16    |
| SFT2D3   |
| ARRDC3   |
| UBAP2    |
| LCMT1    |
| RAG1AP1  |
| BCDIN3D  |
| XAF1     |
| KLHDC6   |
| ERCC6L   |
| RHOD     |
| MAD1L1   |

|          |
|----------|
| A2M      |
| CBLN3    |
| TEX9     |
| NGFRAP1  |
| PKN3     |
| DHX9     |
| TMEM136  |
| TSC22D4  |
| BTC      |
| COL4A5   |
| STX2     |
| PANK4    |
| POLK     |
| MPHOSPH6 |
| GINS1    |
| ABHD10   |
| CITED1   |
| GNB1L    |
| CEP72    |
| AMIGO2   |
| GTPBP10  |
| AK7      |
| MSRB2    |
| TRIM37   |
| PLXNB1   |
| PRDM14   |
| CHML     |
| VRK1     |
| TTF2     |
| SLC6A8   |
| KDEL1C   |
| NAPEPLD  |
| UBA6     |
| LRRC39   |
| L3MBTL2  |
| ASB15    |
| EFCAB7   |
| SLC43A3  |
| MCM9     |
| POLD2    |
| WDR35    |
| USP49    |
| TNNC1    |
| EXOC4    |
| PPIL3    |
| HCCS     |
| FAM107A  |
| DOT1L    |

|          |
|----------|
| ASF1A    |
| PARP12   |
| ITPKA    |
| PRPF3    |
| SUPT16H  |
| FRK      |
| ADORA1   |
| RPA3     |
| OSBPL5   |
| FIBIN    |
| NUDT11   |
| CHRD2    |
| HS2ST1   |
| PIWIL2   |
| GTPBP3   |
| TNFRSF14 |
| RHPN2    |
| GAS2L3   |
| ASTE1    |
| SHF      |
| PLEKHH1  |
| DMRTA1   |
| ABHD2    |
| AEN      |
| REC8     |
| MARS2    |
| GPX8     |
| FAP      |
| RIF1     |
| SYT12    |
| RAB31    |
| ZDHHC24  |
| DDX55    |
| MTHFD2L  |
| SNHG1    |
| UBTD2    |
| CASP2    |
| NMRAL1   |
| ZMAT3    |
| ZDHHC13  |
| ARHGEF19 |
| SNX14    |
| SPIN4    |
| TMX1     |
| TECTB    |
| SS18     |
| ORC1L    |
| PYGB     |

|          |
|----------|
| TPM4     |
| SAMD9L   |
| RTTN     |
| APAF1    |
| PPOX     |
| RPRD1A   |
| ARHGAP17 |
| SUZ12    |
| FABP4    |
| ARHGEF7  |
| KLF16    |
| LIN54    |
| SESTD1   |
| MDM1     |
| RAD18    |
| INHBA    |
| IGF2BP2  |
| VNN3     |
| MED14    |
| FIGN     |
| PPP1R8   |
| TUBD1    |
| FAM110A  |
| RPP30    |
| SLC10A3  |
| FAM40B   |
| CDC25B   |
| LZIC     |
| QPCT     |
| KLHL8    |
| NPAT     |
| CCDC96   |
| MED6     |
| ARHGEF16 |
| H19      |

List of genes with significantly different expression between Ad-Cre and Ad-LacZ treatment of RB<sup>f/f</sup> mice. Raw intensity data were processed to produce the Robust Multi-array average (RMA) and the resultant values were analyzed by SAM software. Following SAM analysis, genes were filtered to ensure inclusion of only genes that were +/-  $\geq 20\%$  expression in the Ad-Cre mice versus the control (Ad-LacZ).
